# Supplementary material for: Root parasitic plant Orobanche aegyptiaca and shoot parasitic plant Cuscuta australis obtained Brassicaceae-specific strictosidine synthase-like genes by horizontal gene transfer
Source: PubMed Central journal article supplement (PMC3893544; doi:10.1186/1471-2229-14-19), 2014-01-13
Supplement: 1471-2229-14-19-S4.pdf [file 1471-2229-14-19-S4.pdf]

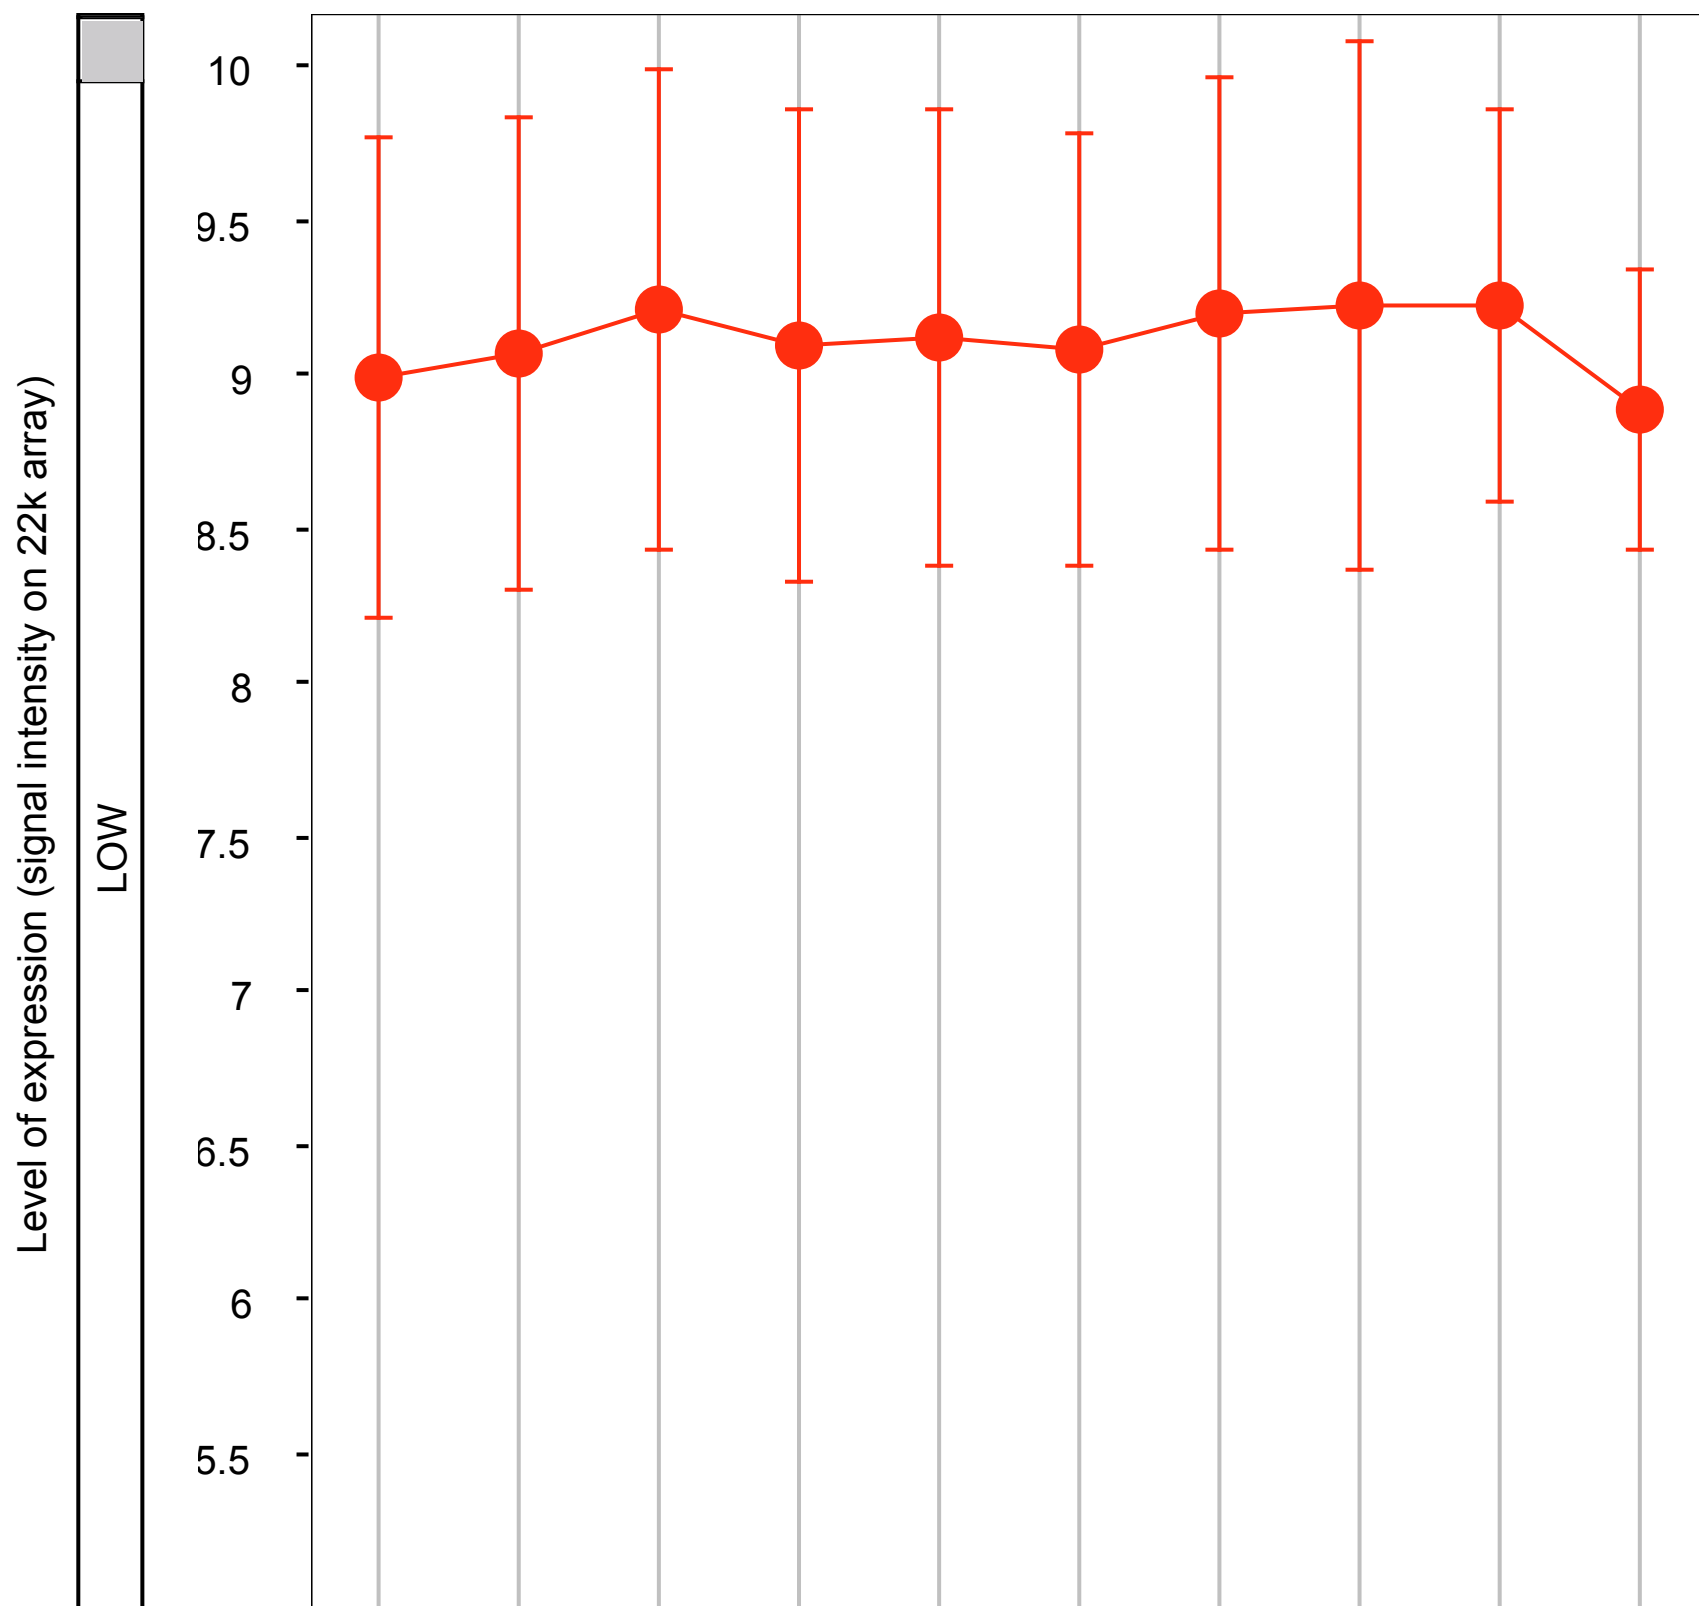

Stage of development

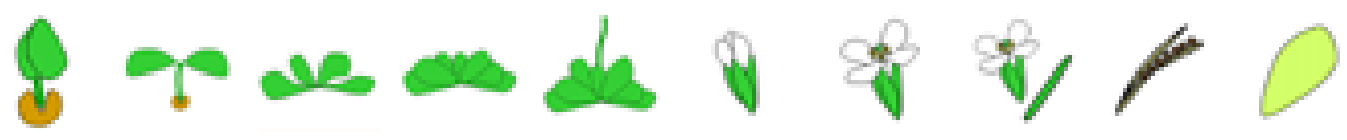

Number of samples

419 2208 773 619 309 651 949 255 93 18

**Additional File 4.** The *AtSSL1* expression levels of *A. thaliana* in different developmental stages calculated by GENEVESTIGATOR.

The expression level for each developmental stage was calculated from sampling pools of the stage. A picture and sampling pool number of each developmental stage were shown below its expression labeling.
