# Supplementary material for: Root parasitic plant Orobanche aegyptiaca and shoot parasitic plant Cuscuta australis obtained Brassicaceae-specific strictosidine synthase-like genes by horizontal gene transfer
Source: PubMed Central journal article supplement (PMC3893544; doi:10.1186/1471-2229-14-19), 2014-01-13
Supplement: 1471-2229-14-19-S7.pdf [file 1471-2229-14-19-S7.pdf]

**Additional File 7.** Results of positive selection using site models

| Branches                | Models      | $\ln L$                         | Parameters                                                 | PSS <sup>3</sup>  |
|-------------------------|-------------|---------------------------------|------------------------------------------------------------|-------------------|
| Large <sup>1</sup>      | M0          | -13826.6585                     | $\omega = 0.1777$                                          | -                 |
|                         | M3          | -13511.5122                     | $p_0 = 0.2974, p_1 = 0.4798, p_2 = 0.2228$                 | n.d. <sup>4</sup> |
|                         |             |                                 | $\omega_0 = 0.0151, \omega_1 = 0.1715, \omega_2 = 0.5014$  |                   |
|                         | M1a         | -13681.8672                     | $p_0 = 0.8422, p_1 = 0.1578$                               | -                 |
|                         |             |                                 | $\omega_0 = 0.1451, \omega_1 = 1.0000$                     |                   |
|                         | M2a         | -13681.8672                     | $p_0 = 0.8422, p_1 = 0.1578, p_2 = 0.00000$                | n.d.              |
|                         |             |                                 | $\omega_0 = 0.1451, \omega_1 = 1.0000, \omega_2 = 27.2532$ |                   |
|                         | M7          | -13509.8118                     | $\beta(0.6711, 2.6316)$                                    | -                 |
| M8                      | -13509.8124 | $\beta(0.6711, 2.6317)$         | n.d.                                                       |                   |
|                         |             | $p_1 = 0.0000, \omega = 1.0000$ |                                                            |                   |
| Small <sup>2</sup>      | M0          | -10086.6556                     | $\omega = 0.1903$                                          | -                 |
|                         | M3          | -9892.8530                      | $p_0 = 0.4314, p_1 = 0.3686, p_2 = 0.2000$                 | n.d.              |
|                         |             |                                 | $\omega_0 = 0.0210, \omega_1 = 0.2345, \omega_2 = 0.5702$  |                   |
|                         | M1a         | -9981.9712                      | $p_0 = 0.7960, p_1 = 0.2040$                               | -                 |
|                         |             |                                 | $\omega_0 = 0.1255, \omega_1 = 1.0000$                     |                   |
|                         | M2a         | -9981.9712                      | $p_0 = 0.7960, p_1 = 0.2040, p_2 = 0.0000$                 | n.d.              |
|                         |             |                                 | $\omega_0 = 0.1255, \omega_1 = 1.0000, \omega_2 = 36.8437$ |                   |
|                         | M7          | -9894.3065                      | $\beta(0.5060, 1.8960)$                                    | -                 |
| $\beta(0.5099, 1.8960)$ |             |                                 |                                                            |                   |
| M8                      | -9894.3098  | $p_1 = 0.0000, \omega = 3.8696$ | n.d.                                                       |                   |

<sup>1</sup>, The sequences used in the large data include the Brassicaceae-specific gene copies (sequences used in the phylogenetic analysis in Figure 2) and their original copies (sequences used in the

phylogenetic analysis in Figure 1).

<sup>2</sup>, The sequences used in the small data include the Brassicaceae-specific gene copies and the two parasitic plant gene copies (sequences used in the phylogenetic analysis in Figure 2).

<sup>3</sup>, Sites undergone positive selection calculated by Bayes Empirical Bayes (BEB) analysis.

<sup>4</sup>, not detected.
