# Supplementary material for: Root parasitic plant Orobanche aegyptiaca and shoot parasitic plant Cuscuta australis obtained Brassicaceae-specific strictosidine synthase-like genes by horizontal gene transfer
Source: PubMed Central journal article supplement (PMC3893544; doi:10.1186/1471-2229-14-19), 2014-01-13
Supplement: 1471-2229-14-19-S8.pdf [file 1471-2229-14-19-S8.pdf]

**Additional File 8.** Results of positive selection using branch-site models.

| Foreground                            | Model       | LnL         | Parameters                                                                                                                                                                                                                                                         | Positively selected sites <sup>4</sup> |
|---------------------------------------|-------------|-------------|--------------------------------------------------------------------------------------------------------------------------------------------------------------------------------------------------------------------------------------------------------------------|----------------------------------------|
| <i>Brassicaceae</i> <sup>1</sup>      | null        | -13622.4689 | $p_0 = 0.8100, p_1 = 0.1372, p_{2a} = 0.0452, p_{2b} = 0.0077$<br>Background: $\omega_0 = 0.1361, \omega_1 = 1.0000, \omega_{2a} = 0.1361, \omega_{2b} = 1.0000$<br>Foreground: $\omega_0 = 0.1361, \omega_1 = 1.0000, \omega_{2a} = 1.0000, \omega_{2b} = 1.0000$ | -                                      |
|                                       | alternative | -13622.4689 | $p_0 = 0.8100, p_1 = 0.1372, p_{2a} = 0.0452, p_{2b} = 0.0077$<br>Background: $\omega_0 = 0.1361, \omega_1 = 1.0000, \omega_{2a} = 0.1361, \omega_{2b} = 1.0000$<br>Foreground: $\omega_0 = 0.1361, \omega_1 = 1.0000, \omega_{2a} = 1.0000, \omega_{2b} = 1.0000$ | NAN                                    |
| <i>Cuscuta australis</i> <sup>2</sup> | null        | -9568.8524  | $p_0 = 0.7723, p_1 = 0.2116, p_{2a} = 0.0126, p_{2b} = 0.0035$<br>Background: $\omega_0 = 0.1225, \omega_1 = 1.0000, \omega_{2a} = 0.1225, \omega_{2b} = 1.0000$<br>Foreground: $\omega_0 = 0.1225, \omega_1 = 1.0000, \omega_{2a} = 1.0000, \omega_{2b} = 1.0000$ | -                                      |
|                                       | alternative | -9567.8055  | $p_0 = 0.7772, p_1 = 0.2133, p_{2a} = 0.0075, p_{2b} = 0.0021$<br>Background: $\omega_0 = 0.1219, \omega_1 = 1.0000, \omega_{2a} = 0.1219, \omega_{2b} = 1.0000$                                                                                                   | NAN                                    |

|                                             |             |            |                                                                                                                                                                                                                                                                      |             |
|---------------------------------------------|-------------|------------|----------------------------------------------------------------------------------------------------------------------------------------------------------------------------------------------------------------------------------------------------------------------|-------------|
|                                             |             |            | Foreground: $\omega_0 = 0.1219, \omega_1 = 1.0000, \omega_{2a} = 6.0725, \omega_{2b} = 6.0725$                                                                                                                                                                       |             |
| <i>Orobanch<br/>aegyptiaca</i> <sup>3</sup> | null        | -9537.3278 | $p_0 = 0.7502, p_1 = 0.2010, p_{2a} = 0.0311, p_{2b} = 0.0087$<br>Background: $\omega_0 = 0.1240, \omega_1 = 1.0000, \omega_{2a} = 0.1240, \omega_{2b} = 1.0000$<br>Foreground: $\omega_0 = 0.1240, \omega_1 = 1.0000, \omega_{2a} = 1.0000, \omega_{2b} = 1.0000$   | -           |
|                                             | alternative | -9534.4507 | $p_0 = 0.7750, p_1 = 0.2187, p_{2a} = 0.0050, p_{2b} = 0.0014$<br>Background: $\omega_0 = 0.1245, \omega_1 = 1.0000, \omega_{2a} = 0.1245, \omega_{2b} = 1.0000$<br>Foreground: $\omega_0 = 0.1245, \omega_1 = 1.0000, \omega_{2a} = 50.1481, \omega_{2b} = 50.1481$ | 181G, 267N* |

<sup>1</sup>, The large dataset, which contains the Brassicaceae-specific gene copies (sequences used in the phylogenetic analysis in Figure 2 and were set as the foreground) and their original gene copies (sequences used in the phylogenetic analysis of Figure 1 and were set as the background)

<sup>2</sup>, The small dataset, which includes the Brassicaceae-specific gene copies [(sequences used in the phylogenetic analysis of Figure 2 and were set as the background) and the *CaSSL* gene in *Cuscuta australis* (set as foreground)].

<sup>3</sup>, The small dataset, which includes the Brassicaceae specific gene copies [(sequences used in the phylogenetic analysis of Figure 2 and were set as the background) and the *OaSSL* gene in *Orobanche aegyptiaca* (set as foreground)].

<sup>4</sup>, Sites undergone positive selection calculated by Bayes Empirical Bayes (BEB) analysis.

\*, The posterior probability is more than 0.95.
